# Supplementary material
Source: PubMed Central journal article supplement (PMC2954887)
Supplement: NIHMS232062-supplement-01.pdf [file NIHMS232062-supplement-01.pdf]

**Table I. Baseline Clinical Characteristics (Safety Population)**

|                                                                                                | Placebo (n=326)        | Donepezil (n=648)      |
|------------------------------------------------------------------------------------------------|------------------------|------------------------|
| <b>Strokes/TIAs</b>                                                                            |                        |                        |
| <b>Strokes</b>                                                                                 | 207 (63.5)             | 429 (66.2)             |
| No. of strokes, mean±SE, median (range)                                                        | 0.9±0.1, 1.0 (0–4)     | 1.0±0.0, 1.0 (0–9)     |
| <b>Strokes before onset of dementia, n (%)</b>                                                 | 173 (53.1)             | 347 (53.5)             |
| No. of strokes, mean±SE, median (range)                                                        | 0.7±0.0, 1.0 (0–3)     | 0.7±0.0, 1.0 (0–6)     |
| <b>Months since first stroke, mean±SE, median (range)</b>                                      | 66.6±5.1, 42.0 (1–367) | 70.5±4.2, 45.5 (1–798) |
| <b>Months since most recent stroke, mean±SE, median (range)</b>                                | 46.8±4.0, 25.0 (1–367) | 48.4±3.0, 27.0 (0–508) |
| <b>TIAs</b>                                                                                    | 106 (32.5)             | 201 (31.0)             |
| No. of TIAs, mean±SE, median (range)                                                           | 0.8±0.1, 0.0 (0–26)    | 0.8±0.1, 0.0 (0–14)    |
| <b>TIAs before onset of dementia, n (%)</b>                                                    | 67 (20.6)              | 139 (21.5)             |
| No. of TIAs, mean±SE, median (range)                                                           | 0.4±0.1, 0.0 (0–20)    | 0.4±0.1, 0.0 (0–12)    |
| <b>Months since first TIA, mean±SE, median (range)</b>                                         | 59.0±6.0, 41.5 (0–332) | 65.2±4.6, 46.5 (1–308) |
| <b>Months since most recent TIA, mean±SE, median (range)</b>                                   | 34.5±3.9, 16.0 (0–234) | 40.3±3.8, 27.0 (0–287) |
| <b>Elements that contributed to the diagnosis of VaD in this patient, n (%)</b>                |                        |                        |
| <b>Dementia onset</b>                                                                          |                        |                        |
| Sudden, temporally related to known vascular event                                             | 192 (58.9)             | 367 (56.6)             |
| Sudden, temporally unrelated to known vascular event                                           | 41 (12.6)              | 85 (13.1)              |
| Gradual                                                                                        | 93 (28.5)              | 192 (29.6)             |
| <b>Dementia progression</b>                                                                    |                        |                        |
| Stepwise decline or fluctuating course (admixed with improvement)                              | 276 (84.7)             | 541 (83.5)             |
| Insidious, constant decline                                                                    | 48 (14.7)              | 94 (14.5)              |
| <b>Memory</b>                                                                                  |                        |                        |
| Memory deficit present but not most prominent feature of the dementia                          | 156 (47.9)             | 291 (44.9)             |
| Memory deficit most prominent feature of the dementia                                          | 170 (52.1)             | 353 (54.5)             |
| <b>Executive dysfunction (onset)</b>                                                           |                        |                        |
| Mild dysfunction, early in the course of dementia                                              | 271 (83.1)             | 521 (80.4)             |
| Severe dysfunction, early in the course of dementia                                            | 41 (12.6)              | 97 (15.0)              |
| Severe dysfunction, late in the course of dementia                                             | 9 (9.8)                | 20 (3.1)               |
| <b>Dementia subtype</b>                                                                        |                        |                        |
| Subcortical                                                                                    | 130 (39.9)             | 268 (41.4)             |
| Cortical                                                                                       | 51 (15.6)              | 104 (16.0)             |
| Both subcortical and cortical                                                                  | 145 (44.5)             | 272 (42.0)             |
| <b>Neurologic exam</b>                                                                         |                        |                        |
| Focal deficits present when dementia was diagnosed                                             | 212 (65.0)             | 421 (65.0)             |
| Focal deficits subtle or absent when dementia was diagnosed                                    | 112 (34.4)             | 217 (33.5)             |
| <b>Neuroimaging when dementia diagnosed</b>                                                    |                        |                        |
| Infarcts of white matter lesions present                                                       | 312 (95.7)             | 612 (94.4)             |
| Normal (excluding atrophy)                                                                     | 4 (1.2)                | 8 (1.2)                |
| Not done or unavailable                                                                        | 10 (3.1)               | 21 (3.7)               |
| <b>Gait disturbances (unsteadiness, frequent and unprovoked falls, other gait disturbance)</b> |                        |                        |
| Early in the course of disease                                                                 | 120 (36.8)             | 274 (42.3)             |
| Late in the course of disease                                                                  | 16 (4.9)               | 32 (4.9)               |
| No relevant gait disturbance                                                                   | 184 (56.4)             | 328 (50.6)             |
| Not applicable (eg, patient nonambulatory)                                                     | 4 (1.2)                | 9 (1.4)                |

*(Continued)*

Table I. Continued

|                                                                             | Placebo (n=326) | Donepezil (n=648) |
|-----------------------------------------------------------------------------|-----------------|-------------------|
| Urinary symptoms (frequency, urgency, and/or nocturia)                      |                 |                   |
| Early in the course of disease                                              | 62 (19.0)       | 97 (15.0)         |
| Late in the course of disease                                               | 16 (4.9)        | 35 (5.4)          |
| No relevant urinary symptoms                                                | 184 (56.4)      | 490 (75.6)        |
| Not applicable (eg, indwelling catheter)                                    | 4 (1.2)         | 22 (3.4)          |
| Vascular history (risk)                                                     |                 |                   |
| Vascular risk factors present (hypertension, diabetes, etc)                 | 298 (91.4)      | 578 (89.2)        |
| No vascular risk factors on history                                         | 28 (8.6)        | 66 (10.2)         |
| Vascular history (infarctions)                                              |                 |                   |
| History of TIAs or stroke(s)                                                | 231 (82.8)      | 522 (75.1)        |
| No history of TIAs or stroke(s)                                             | 46 (16.5)       | 171 (24.6)        |
| Pseudobulbar palsy                                                          |                 |                   |
| Present                                                                     | 19 (5.8)        | 51 (7.9)          |
| Absent                                                                      | 307 (94.2)      | 593 (91.5)        |
| Personality/mood changes                                                    |                 |                   |
| Present, likely of subcortical origin                                       | 201 (61.7)      | 358 (55.2)        |
| No change compared with predemented state                                   | 125 (38.3)      | 286 (44.1)        |
| Clinical characteristics                                                    |                 |                   |
| Smoking (current)                                                           | 31 (9.5)        | 69 (10.6)         |
| DAT inventory total score (range, 1–18), mean±SE*                           | 11.13±0.12      | 11.04±0.09        |
| Concomitant medications used by at least 10% of patients in either group, % |                 |                   |
| Agents acting on the renin-angiotensin system                               | 49.1            | 46.6              |
| Analgesics                                                                  | 17.2            | 15.0              |
| Antithrombotic agents                                                       | 82.2            | 74.5              |
| β-Blocking agents                                                           | 28.8            | 24.7              |
| Calcium channel blockers                                                    | 22.1            | 25.5              |
| Cardiac therapy                                                             | 16.9            | 15.4              |
| Diuretics                                                                   | 31.0            | 30.4              |
| Drugs for diabetes treatment                                                | 14.7            | 14.5              |
| Serum lipid-reducing agents                                                 | 40.5            | 39.4              |
| Thyroid therapy                                                             | 11.7            | 10.6              |

TIA indicates transient ischemic attack; and DAT, dementia of the Alzheimer type.

\*Because this rating scale has items that can take a “not applicable” value, a mean of the “applicable” items is used rather than a total score. The overall mean score is calculated as 100 times  $P$ , where  $P$  indicates the average tendency for the patient to score between the lowest and highest score among the applicable transformed items. A higher score indicates better performance.

Table II. Primary and Secondary Outcome Measures Stratified by Scheltens' Scores

|            | V-ADAS-cog                                            |          |                                                       |          | NCT                                                   |          |                                                       |          |
|------------|-------------------------------------------------------|----------|-------------------------------------------------------|----------|-------------------------------------------------------|----------|-------------------------------------------------------|----------|
|            | NH                                                    |          | HA                                                    |          | NH                                                    |          | HA                                                    |          |
|            | Difference in LS Mean<br>$\Delta$ ( $\pm$ SE)         | <i>P</i> | Difference in LS<br>Mean $\Delta$ ( $\pm$ SE)         | <i>P</i> | Difference in LS<br>Mean $\Delta$ ( $\pm$ SE)         | <i>P</i> | Difference in LS<br>Mean $\Delta$ ( $\pm$ SE)         | <i>P</i> |
| Week 6*    | -0.652 (0.44)                                         | 0.20     | -0.457 (0.53)                                         | 0.42     | -0.146 (0.10)                                         | 0.20     | -0.060 (0.10)                                         | 0.58     |
| Week 12*   | -0.445 (0.47)                                         | 0.41     | -2.221 (0.62)                                         | <0.01    | -0.206 (0.10)                                         | 0.07     | -0.094 (0.09)                                         | 0.35     |
| Week 18*   | -0.286 (0.50)                                         | 0.62     | -2.434 (0.70)                                         | <0.01    | -0.108 (0.10)                                         | 0.32     | -0.094 (0.09)                                         | 0.33     |
| Week 24*   | -1.193 (0.60)                                         | 0.09     | -2.265 (0.78)                                         | <0.01    | -0.189 (0.12)                                         | 0.16     | -0.120 (0.10)                                         | 0.27     |
| End point† | -1.303 (0.55)                                         | 0.04     | -2.003 (0.71)                                         | 0.01     | -0.188 (0.11)                                         | 0.12     | -0.076 (0.09)                                         | 0.46     |
|            | Baseline LS Mean ( $\pm$ SE)                          |          | Baseline LS Mean ( $\pm$ SE)                          |          | Baseline LS Mean ( $\pm$ SE)                          |          | Baseline LS Mean ( $\pm$ SE)                          |          |
| Placebo    | 18.05 (0.94)                                          |          | 23.89 (1.13)                                          |          | 2.62 (0.13)                                           |          | 3.19 (0.11)                                           |          |
| Donepezil  | 16.95 (0.75)                                          |          | 23.12 (0.83)                                          |          | 2.74 (0.10)                                           |          | 3.11 (0.08)                                           |          |
|            | Baseline to End Point<br>$\Delta$ LS Mean ( $\pm$ SE) |          | Baseline to End Point<br>$\Delta$ LS Mean ( $\pm$ SE) |          | Baseline to End Point<br>$\Delta$ LS Mean ( $\pm$ SE) |          | Baseline to End Point<br>$\Delta$ LS Mean ( $\pm$ SE) |          |
| Placebo    | -0.80 (0.53)                                          |          | 1.44 (0.67)                                           |          | -0.26 (0.10)                                          |          | -0.02 (0.09)                                          |          |
| Donepezil  | -2.11 (0.42)                                          |          | -0.56 (0.50)                                          |          | -0.45 (0.08)                                          |          | -0.10 (0.07)                                          |          |
|            | CIBIC-Plus                                            |          |                                                       |          | DAD                                                   |          |                                                       |          |
|            | NH                                                    |          | HA                                                    |          | NH                                                    |          | HA                                                    |          |
|            | Difference in Percentage<br>With Improvement‡         | <i>P</i> | Difference in Percentage<br>With Improvement          | <i>P</i> | Difference in LS Mean<br>$\Delta$ ( $\pm$ SE)         | <i>P</i> | Difference in LS Mean<br>$\Delta$ ( $\pm$ SE)         | <i>P</i> |
| Week 6*    | 7.9                                                   | 0.40     | 0.3                                                   | 0.84     |                                                       |          |                                                       |          |
| Week 12*   | 14.8                                                  | 0.03     | 6.3                                                   | 0.76     |                                                       |          |                                                       |          |
| Week 18*   | 12.7                                                  | 0.03     | 9.9                                                   | 0.17     |                                                       |          |                                                       |          |
| Week 24*   | 15.8                                                  | 0.10     | 10.3                                                  | 0.19     | 2.822 (1.33)                                          | 0.07     | 1.985 (1.60)                                          | 0.25     |
| End point  | 14.5                                                  | 0.10     | 7.2                                                   | 0.43     | 3.288 (1.25)                                          | 0.02     | 1.878 (1.60)                                          | 0.28     |
|            | Baseline Mean                                         |          | Baseline Mean                                         |          | Baseline LS Mean<br>( $\pm$ SE)                       |          | Baseline LS Mean<br>( $\pm$ SE)                       |          |
| Placebo    | 3.32                                                  |          | 3.67                                                  |          | 75.82 (2.08)                                          |          | 67.37 (2.21)                                          |          |
| Donepezil  | 3.38                                                  |          | 3.69                                                  |          | 78.04 (1.64)                                          |          | 70.45 (1.68)                                          |          |
|            | Percentage With Improvement<br>From Baseline          |          | Percentage With Improvement<br>From Baseline          |          | Baseline to End Point<br>$\Delta$ LS Mean ( $\pm$ SE) |          | Baseline to End Point<br>$\Delta$ LS Mean ( $\pm$ SE) |          |
| Placebo    | 29.7                                                  |          | 21.3                                                  |          | 0.07 (1.19)                                           |          | -0.94 (1.46)                                          |          |
| Donepezil  | 44.2                                                  |          | 28.5                                                  |          | 3.36 (0.93)                                           |          | 0.94 (1.11)                                           |          |
|            | ADAS-cog                                              |          |                                                       |          |                                                       |          |                                                       |          |
|            | NH                                                    |          |                                                       |          | HA                                                    |          |                                                       |          |
|            | Difference in LS Mean<br>$\Delta$ ( $\pm$ SE)         | <i>P</i> | Difference in LS Mean<br>$\Delta$ ( $\pm$ SE)         | <i>P</i> | Difference in LS Mean<br>$\Delta$ ( $\pm$ SE)         | <i>P</i> | Difference in LS Mean<br>$\Delta$ ( $\pm$ SE)         | <i>P</i> |
| Week 6*    | -0.245 (0.72)                                         | 0.57     | -0.699 (0.44)                                         | 0.14     |                                                       |          |                                                       |          |
| Week 12*   | -0.347 (0.42)                                         | 0.47     | -1.906 (0.53)                                         | <0.01    |                                                       |          |                                                       |          |
| Week 18*   | 0.013 (0.47)                                          | 0.98     | -2.139 (0.60)                                         | <0.01    |                                                       |          |                                                       |          |
| Week 24*   | -1.107 (0.47)                                         | 0.06     | -1.522 (0.65)                                         | 0.04     |                                                       |          |                                                       |          |
| End point  | -1.201 (0.47)                                         | 0.03     | -1.249 (0.60)                                         | 0.06     |                                                       |          |                                                       |          |
|            | Baseline LS Mean ( $\pm$ SE)                          |          | Baseline LS Mean ( $\pm$ SE)                          |          | Baseline LS Mean ( $\pm$ SE)                          |          | Baseline LS Mean ( $\pm$ SE)                          |          |
| Placebo    | 15.40 (0.85)                                          |          | 20.47 (1.02)                                          |          |                                                       |          |                                                       |          |
| Donepezil  | 14.22 (0.68)                                          |          | 19.46 (0.76)                                          |          |                                                       |          |                                                       |          |
|            | Baseline to End Point $\Delta$ LS Mean ( $\pm$ SE)    |          | Baseline to End Point $\Delta$ LS Mean ( $\pm$ SE)    |          | Baseline to End Point $\Delta$ LS Mean ( $\pm$ SE)    |          | Baseline to End Point $\Delta$ LS Mean ( $\pm$ SE)    |          |
| Placebo    | -0.73 (0.45)                                          |          | 0.54 (0.56)                                           |          |                                                       |          |                                                       |          |
| Donepezil  | -1.93 (0.36)                                          |          | -0.71 (0.42)                                          |          |                                                       |          |                                                       |          |

LS indicates least squares; NH, normal hippocampal size; HA, hippocampal atrophy; NCT, Number Cancellation test.

\*Observed cases.

†ITT.

‡Sum of minimal, moderate, and marked improvement (the *P* value is based on the difference in the overall distribution, according to the Cochran-Mantel-Haenszel test).
